# Supplementary material for: Aspiration-assisted freeform bioprinting of prefabricated tissue spheroids in a yield-stress gel
Source: PubMed Central journal article supplement (PMC7695349; doi:10.1038/s42005-020-00449-4), 2020-10-16
Supplement: NIHMS1645583-supplement-Description_of_Additional_Supplementary_Files.pdf [file NIHMS1645583-supplement-Description_of_Additional_Supplementary_Files.pdf]

## **Description of Additional Supplementary Files**

File Name: Supplementary Movie 1

Description: Bioprinting of MSC spheroid pairs in alginate microparticles (40X Speed)

File Name: Supplementary Movie 2

Description: Bioprinting of spheroids in yield-stress Carbopol gel (2X Speed)

File Name: Supplementary Movie 3

Description: A spheroid got stacked at the media-Carbopol interface during bioprinting process

File Name: Supplementary Movie 4

Description: Bouncing of a spheroid at the pipette tip while transitioning in Carbopol
